# Supplementary material for: Planar cell polarity: the orientation of larval denticles in Drosophila appears to depend on gradients of Dachsous and Fat
Source: Oxford University Press journal article supplement (doi:10.1242/dev.047126), 2010-09-09
Supplement: dev047126supptables1.pdf [file dev047126supptables1.pdf]

**Table S1. Quantitation of denticle orientation**

| Row | Wild type |      | <i>en.Gal4 UAS.ds</i> |                | <i>ptc.Gal4 UAS.ds</i> |                  | <i>ptc.Gal4 UAS.ectoDs tub.Gal80<sup>ts</sup> 17°C</i> |               | <i>ptc.Gal4 UAS.ectoDs tub.Gal80<sup>ts</sup> 17°C&gt;29°C</i> |                 | <i>ptc.Gal4 UAS.ectoDs tub.Gal80<sup>ts</sup> 29°C</i> |                 | <i>ptc.Gal4 UAS.ectoDs tub.Gal80<sup>ts</sup> 29°C&gt;17°C</i> |               | <i>en.Gal4 UAS.ft</i> |               | <i>ptc.Gal4 UAS.ft</i> |               |
|-----|-----------|------|-----------------------|----------------|------------------------|------------------|--------------------------------------------------------|---------------|----------------------------------------------------------------|-----------------|--------------------------------------------------------|-----------------|----------------------------------------------------------------|---------------|-----------------------|---------------|------------------------|---------------|
|     | Up        | Down | Up                    | Down           | Up                     | Down             | Up                                                     | Down          | Up                                                             | Down            | Up                                                     | Down            | Up                                                             | Down          | Up                    | Down          | Up                     | Down          |
| 0   | 126       | 1    | 141                   | 1<br>(0.50)    | 95                     | 1<br>(0.51)      | 171                                                    | 1<br>(0.52)   | 150                                                            | 2<br>(0.56)     | 109                                                    | 1<br>(0.51)     | 126                                                            | 2<br>(0.67)   | 7                     | 0<br>(N.A.)   | 118                    | 2<br>(0.71)   |
| 1   | 94        | 1    | 169                   | 3<br>(0.61)    | 10                     | 101<br>(165.66)* | 185                                                    | 1<br>(0.57)   | 187                                                            | 47<br>(20.13)*  | 125                                                    | 73<br>(43.98)*  | 217                                                            | 8<br>(2.02)   | 202                   | 3<br>(0.49)   | 179                    | 1<br>(0.56)   |
| 2   | 1         | 76   | 52                    | 51<br>(51.48)* | 115                    | 5<br>(172.05)*   | 1                                                      | 151<br>(0.57) | 50                                                             | 106<br>(28.89)* | 65                                                     | 51<br>(61.80)*  | 10                                                             | 144<br>(3.51) | 0                     | 155<br>(2.14) | 2                      | 141<br>(0.40) |
| 3   | 3         | 148  | 125                   | 5<br>(249.75)* | 126                    | 4<br>(253.54)*   | 1                                                      | 205<br>(1.83) | 86                                                             | 102<br>(82.95)* | 87                                                     | 31<br>(153.02)* | 8                                                              | 171<br>(1.72) | 2                     | 268<br>(1.21) | 1                      | 201<br>(1.79) |
| 4   | 87        | 2    | 144                   | 1<br>(1.13)    | 97                     | 1<br>(0.75)      | 159                                                    | 8<br>(1.30)   | 156                                                            | 1<br>(1.23)     | 145                                                    | 1<br>(1.14)     | 167                                                            | 2<br>(0.50)   | 189                   | 1<br>(1.50)   | 144                    | 1<br>(1.13)   |
| 5   | 2         | 94   | 8                     | 181<br>(1.18)  | 1                      | 79<br>(0.57)     | 2                                                      | 159<br>(0.41) | 1                                                              | 151<br>(1.09)   | 7                                                      | 175<br>(0.91)   | 7                                                              | 149<br>(1.27) | 2                     | 164<br>(0.43) | 8                      | 152<br>(1.65) |
| 6   | 1         | 89   | 1                     | 339<br>(0.77)  | 1                      | 176<br>(0.57)    | 1                                                      | 271<br>(0.68) | 1                                                              | 352<br>(0.79)   | 3                                                      | 300<br>(0.30)   | 2                                                              | 331<br>(0.35) | 2                     | 285<br>(1.83) | 2                      | 299<br>(0.34) |

Denticles were recorded as pointing anteriorly (up) or posteriorly (down). The numbers between parentheses are the Yates' adjusted  $\chi^2$  values obtained after comparing in a contingency test the orientation of denticles in each row with the wild type. The critical values for significance levels of 0.05 and 0.001 are 3.841 and 10.828, respectively (Rohlf and Sokal, 1995). Values indicating a high significant departure from the wild-type orientation are labelled with an asterisk.

N.A., not applicable.

**Reference**

Rohlf, F. J. and Sokal, R. R. (1995). *Statistical Tables*. New York: WH Freeman and Co.
