# Supplementary figures and images for: Planar cell polarity: the orientation of larval denticles in Drosophila appears to depend on gradients of Dachsous and Fat
Source: Oxford University Press journal article supplement (doi:10.1242/dev.047126), 2010-09-09

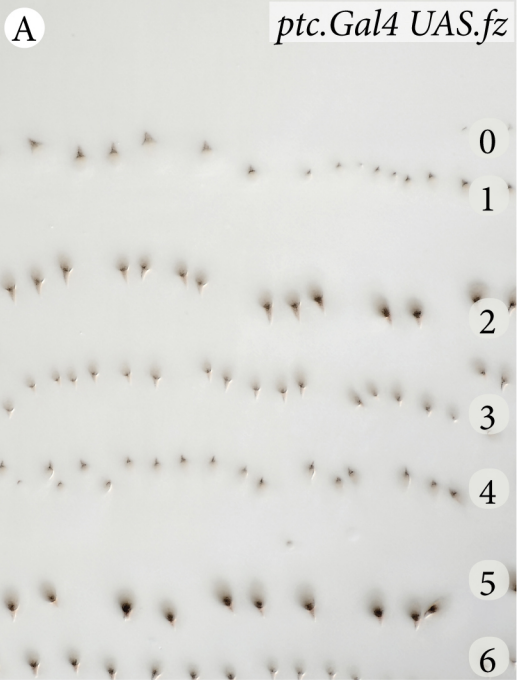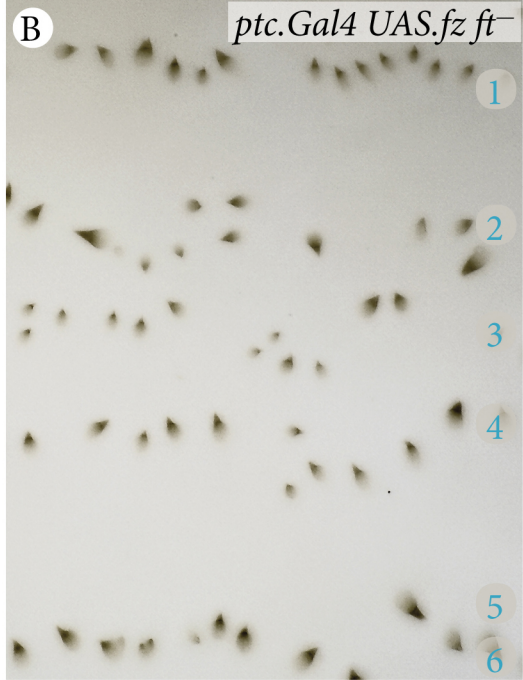

Supplement: dev047126figs1.pdf [file dev047126figs1.pdf]

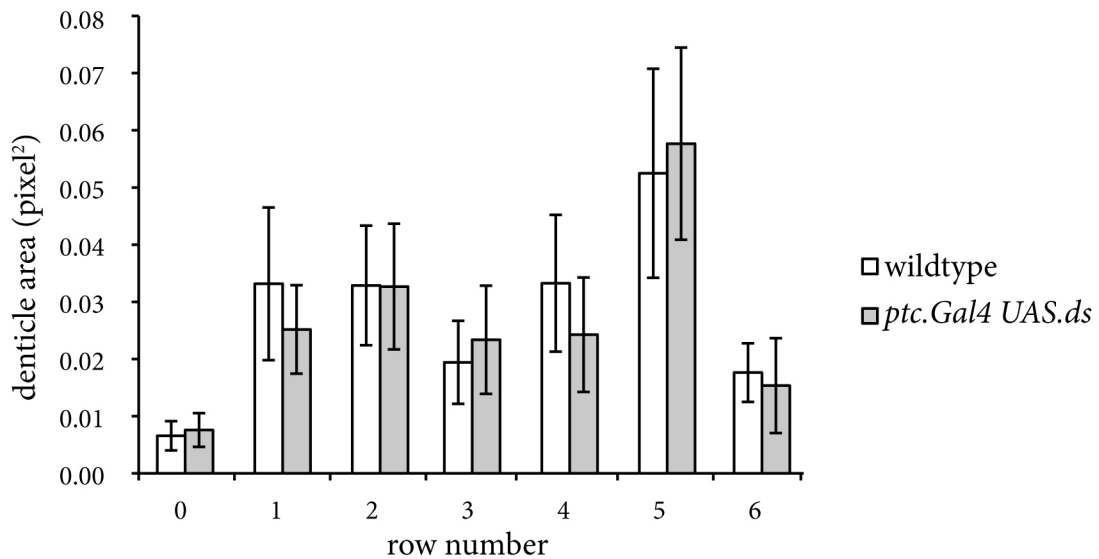

Supplement: dev047126figs2.pdf [file dev047126figs2.pdf]
